# Supplementary material for: Improving the understanding of how patients with non-dystrophic myotonia are selected for myotonia treatment with mexiletine (NaMuscla): outcomes of treatment impact using a European Delphi panel
Source: Springer Nature journal article supplement (doi:10.1186/s12883-021-02491-3), 2021-12-01
Supplement: MOESM3 [file 19919764]

**Title:** Improving the understanding of how patients with non-dystrophic myotonia are selected for myotonia treatment with mexiletine (NaMuscla): outcomes of treatment impact using a European Delphi panel

**Authors:** Ann-Marie Chapman<sup>1</sup>, Marieke Schurer<sup>2\*</sup>, Laure Weijers<sup>2</sup>, Amer Omar<sup>3</sup>, Hiba Lee<sup>4</sup>, Alla Zozulya-Weidenfeller<sup>3</sup>, Crispin Ellis<sup>5</sup>, Shaneil Sonecha<sup>5</sup>, Christiane Schneider-Gold<sup>6</sup>

\*Correspondence: [mschurer@bresmed.com](mailto:mschurer@bresmed.com)

<sup>1</sup> BresMed Health Solutions Ltd, Sheffield, UK

<sup>2</sup> BresMed Netherlands BV, Utrecht, The Netherlands

<sup>3</sup> Lupin Atlantis Holdings SA, Zug Switzerland

<sup>4</sup> AGH Partners Ltd, London, UK

<sup>5</sup> Lupin Healthcare Ltd, Slough, UK

<sup>6</sup> St. Josef-Hospital, Bochum, Germany

## **Selection criteria Delphi panellists**

### **Selection criteria for the UK experts**

- The participant must work in one of the 18 neuroscience specialist centres as determined by NHS England, or work in one of the main centres in Scotland or Wales.
- The centre should be known to treat at least five NDM patients (quantifiable expertise).
- The participant must be known as a neurology expert in the treatment of NDM patients (qualitative expertise), who Lupin believes would have the knowledge and capability to answer the questions posed in the Delphi survey.
- The participant must be previously responsive to a Lupin invitation, to avoid irritation to any potential expert who would be highly unlikely to engage.

### **Selection criteria for experts from outside the UK**

Experts from outside the UK must:

- Be a key opinion leader in the field:
  - Internationally recognized by peers as expert in the fields of Myotonia
  - Members of neurology societies and neuromuscular research societies
- Have proven international expertise in the field of NDM, as demonstrated through:
  - Experience in clinical research as well as management of patients with NDM,
  - Publications, and
  - Experience as an advocate and speaker on relevant conferences.
